# Supplementary material for: Sarcopenia and adverse health‐related outcomes: An umbrella review of meta‐analyses of observational studies
Source: PubMed Central journal article supplement (PMC7643685; doi:10.1002/cam4.3428), 2020-09-13
Supplement: CAM4-9-7964-s001.pdf [file CAM4-9-7964-s001.pdf]

## Figure S1. Search strategies

PubMed:

History [Download history](#) [Clear history](#)

| Search | Add to builder      | Query                                                                                                                                                                     | Items found            | Time     |
|--------|---------------------|---------------------------------------------------------------------------------------------------------------------------------------------------------------------------|------------------------|----------|
| #3     | <a href="#">Add</a> | Search (((Sarcopenia[Title/Abstract] OR sarcopenic[Title/Abstract] OR muscle[Title/Abstract])) AND ((Systematic review[Title/Abstract] OR meta-analysis[Title/Abstract])) | <a href="#">3442</a>   | 08:33:59 |
| #2     | <a href="#">Add</a> | Search (Systematic review[Title/Abstract] OR meta-analysis[Title/Abstract])                                                                                               | <a href="#">213086</a> | 08:33:23 |
| #1     | <a href="#">Add</a> | Search ((Sarcopenia[Title/Abstract] OR sarcopenic[Title/Abstract] OR muscle[Title/Abstract])                                                                              | <a href="#">620947</a> | 08:32:37 |

Web of Science:

| Set | Results                                                                                                                                               | Save History             | Open Saved History       | Combine Sets             | Delete Sets              |
|-----|-------------------------------------------------------------------------------------------------------------------------------------------------------|--------------------------|--------------------------|--------------------------|--------------------------|
| #8  | <b>10,480</b> #7 AND #6<br><i>Databases= WOS, DIIDW, INSPEC, KJD, MEDLINE, RSCI, SCIELO Timespan=All years Search language=Auto</i>                   | <input type="checkbox"/> | <input type="checkbox"/> | <input type="checkbox"/> | <input type="checkbox"/> |
| #7  | <b>405,754</b> #5 OR #4<br><i>Databases= WOS, DIIDW, INSPEC, KJD, MEDLINE, RSCI, SCIELO Timespan=All years Search language=Auto</i>                   | <input type="checkbox"/> | <input type="checkbox"/> | <input type="checkbox"/> | <input type="checkbox"/> |
| #6  | <b>1,912,418</b> #3 OR #2 OR #1<br><i>Databases= WOS, DIIDW, INSPEC, KJD, MEDLINE, RSCI, SCIELO Timespan=All years Search language=Auto</i>           | <input type="checkbox"/> | <input type="checkbox"/> | <input type="checkbox"/> | <input type="checkbox"/> |
| #5  | <b>209,507</b> TOPIC: (meta-analysis)<br><i>Databases= WOS, DIIDW, INSPEC, KJD, MEDLINE, RSCI, SCIELO Timespan=All years Search language=Auto</i>     | <input type="checkbox"/> | <input type="checkbox"/> | <input type="checkbox"/> | <input type="checkbox"/> |
| #4  | <b>276,758</b> TOPIC: (Systematic review)<br><i>Databases= WOS, DIIDW, INSPEC, KJD, MEDLINE, RSCI, SCIELO Timespan=All years Search language=Auto</i> | <input type="checkbox"/> | <input type="checkbox"/> | <input type="checkbox"/> | <input type="checkbox"/> |
| #3  | <b>1,909,482</b> TOPIC: (muscle)<br><i>Databases= WOS, DIIDW, INSPEC, KJD, MEDLINE, RSCI, SCIELO Timespan=All years Search language=Auto</i>          | <input type="checkbox"/> | <input type="checkbox"/> | <input type="checkbox"/> | <input type="checkbox"/> |
| #2  | <b>2,239</b> TOPIC: (sarcopenic)<br><i>Databases= WOS, DIIDW, INSPEC, KJD, MEDLINE, RSCI, SCIELO Timespan=All years Search language=Auto</i>          | <input type="checkbox"/> | <input type="checkbox"/> | <input type="checkbox"/> | <input type="checkbox"/> |
| #1  | <b>13,288</b> TOPIC: (Sarcopenia)<br><i>Databases= WOS, DIIDW, INSPEC, KJD, MEDLINE, RSCI, SCIELO Timespan=All years Search language=Auto</i>         | <input type="checkbox"/> | <input type="checkbox"/> | <input type="checkbox"/> | <input type="checkbox"/> |

Embase:

▼ Search History (3) [View Saved](#) ⋮

| # ▲ | Searches                                 | Results | Type     | Actions                                                | Annotations              |
|-----|------------------------------------------|---------|----------|--------------------------------------------------------|--------------------------|
| 1   | (Sarcopenia or sarcopenic or muscle).ab. | 702709  | Advanced | <a href="#">Display Results</a> <a href="#">More ▼</a> | <input type="checkbox"/> |
| 2   | (Systematic review or meta-analysis).ab. | 211500  | Advanced | <a href="#">Display Results</a> <a href="#">More ▼</a> | <input type="checkbox"/> |
| 3   | 1 and 2                                  | 3372    | Advanced | <a href="#">Display Results</a> <a href="#">More ▼</a> | <input type="checkbox"/> |

Figure S2. Flowchart of the selection process

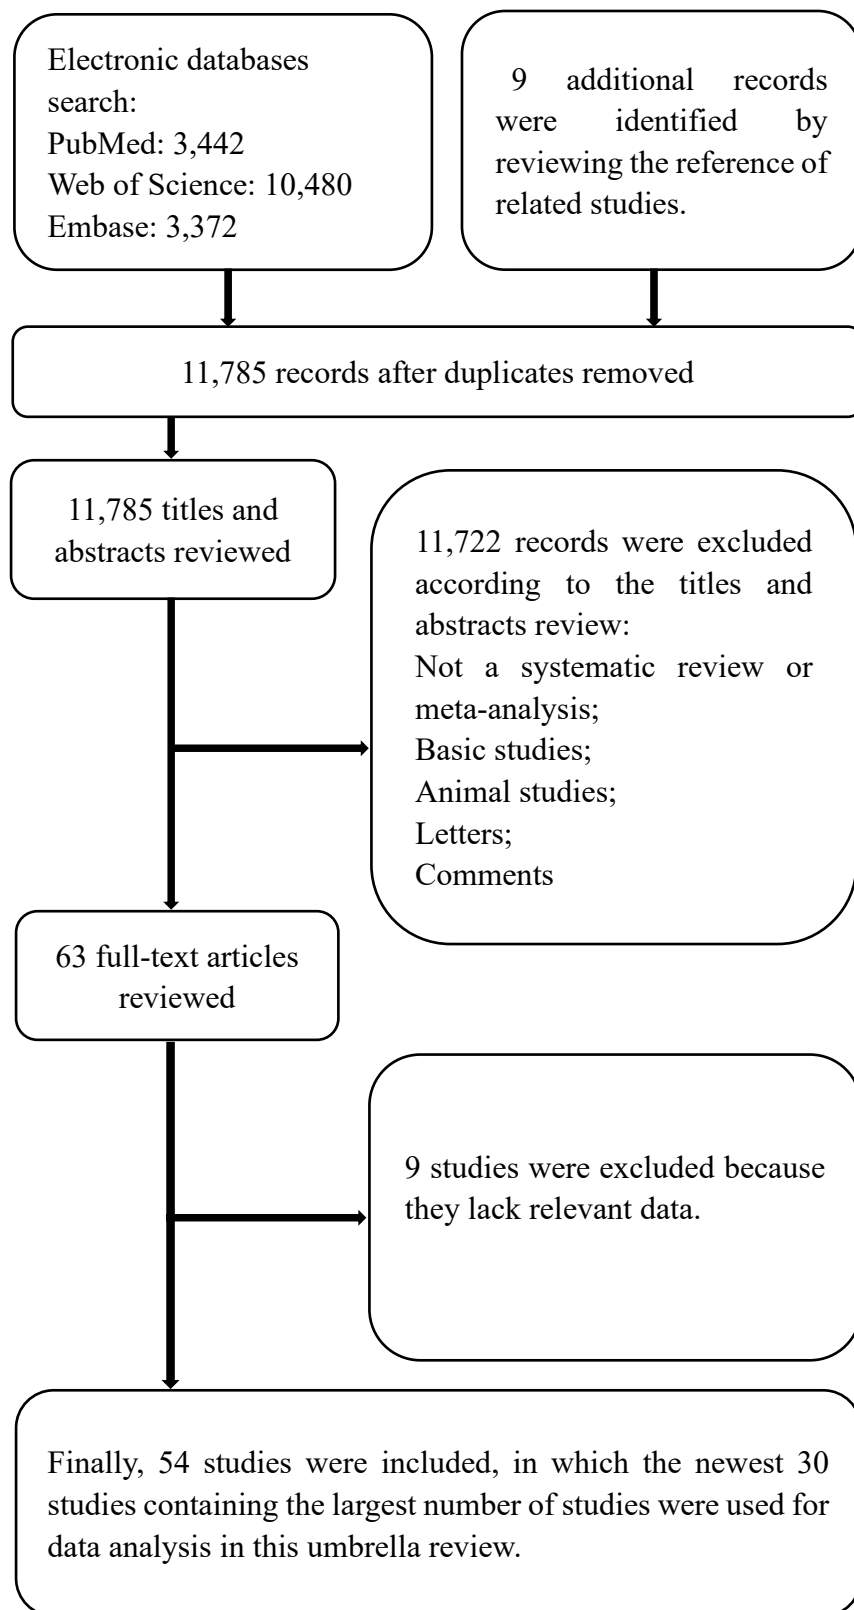

Table S1. Methodological quality assessment of included meta-analyses according to the AMSTAR

| Author                    | Year | No. of 1 | No. of 2 | No. of 3 | No. of 4 | No. of 5 | No. of 6 | No. of 7 | No. of 8 | No. of 9 | No. of 10 | No. of 11 | AMSTAR |
|---------------------------|------|----------|----------|----------|----------|----------|----------|----------|----------|----------|-----------|-----------|--------|
| Wong, A., et al           | 2020 | 1        | 1        | 1        | 1        | 1        | 1        | 1        | 1        | 1        | 1         | 1         | 11     |
| Zhang, X. M., et al       | 2020 | 1        | 1        | 1        | 1        | 1        | 1        | 1        | 1        | 1        | 1         | 1         | 11     |
| Jia, S., et al            | 2020 | 1        | 1        | 1        | 1        | 1        | 1        | 1        | 1        | 1        | 0         | 1         | 10     |
| Wang, P. Y., et al        | 2020 | 1        | 0        | 1        | 0        | 1        | 1        | 1        | 1        | 1        | 1         | 1         | 9      |
| Bundred, J., et al        | 2019 | 1        | 1        | 1        | 1        | 1        | 0        | 1        | 1        | 1        | 1         | 1         | 10     |
| Ida, S., et al            | 2019 | 0        | 0        | 1        | 1        | 1        | 1        | 1        | 1        | 1        | 0         | 1         | 8      |
| Su, H., et al             | 2019 | 0        | 0        | 1        | 1        | 1        | 1        | 1        | 1        | 1        | 0         | 1         | 8      |
| Ubachs, J., et al         | 2019 | 0        | 1        | 1        | 0        | 1        | 1        | 1        | 1        | 1        | 0         | 1         | 8      |
| Zhao, Y., et al           | 2019 | 0        | 0        | 0        | 1        | 0        | 1        | 1        | 1        | 1        | 0         | 1         | 6      |
| Deng, H. Y., et al        | 2019 | 0        | 1        | 1        | 1        | 0        | 1        | 1        | 1        | 1        | 1         | 1         | 9      |
| Hu, X., et al             | 2019 | 0        | 0        | 1        | 1        | 0        | 1        | 1        | 1        | 1        | 1         | 1         | 8      |
| Deng, H. Y., et al        | 2019 | 0        | 1        | 1        | 1        | 1        | 1        | 1        | 1        | 1        | 0         | 1         | 9      |
| Kamarajah, S. K., et al   | 2019 | 0        | 0        | 1        | 0        | 0        | 1        | 1        | 1        | 1        | 1         | 1         | 7      |
| Hua, H., et al            | 2019 | 0        | 1        | 0        | 1        | 0        | 1        | 1        | 1        | 1        | 0         | 1         | 7      |
| Chang, K. V., et al       | 2019 | 0        | 0        | 1        | 1        | 0        | 1        | 1        | 1        | 1        | 1         | 1         | 8      |
| Yeung, S. S. Y., et al    | 2019 | 1        | 0        | 1        | 1        | 0        | 1        | 1        | 1        | 1        | 1         | 1         | 9      |
| Zhang, X., et al          | 2019 | 1        | 1        | 1        | 1        | 0        | 1        | 1        | 1        | 1        | 0         | 1         | 9      |
| Cabett Cipolli, G., et al | 2019 | 0        | 1        | 1        | 1        | 0        | 1        | 1        | 1        | 1        | 0         | 1         | 8      |
| Chang, K. V., et al       | 2018 | 0        | 1        | 1        | 1        | 0        | 1        | 1        | 1        | 1        | 1         | 1         | 9      |
| Sun, G., et al            | 2018 | 0        | 1        | 0        | 1        | 0        | 1        | 1        | 1        | 1        | 1         | 1         | 8      |
| Yang, Z., et al           | 2018 | 0        | 1        | 0        | 0        | 1        | 1        | 1        | 1        | 1        | 0         | 1         | 7      |

|                     |      |   |   |   |   |   |   |   |   |   |   |   |   |
|---------------------|------|---|---|---|---|---|---|---|---|---|---|---|---|
| Simonsen, C., et al | 2018 | 0 | 1 | 1 | 0 | 1 | 1 | 1 | 1 | 1 | 1 | 1 | 9 |
| Zhang, H., et al    | 2018 | 0 | 1 | 0 | 1 | 0 | 1 | 0 | 1 | 1 | 1 | 1 | 7 |
| Yu, R., et al       | 2018 | 0 | 1 | 1 | 0 | 0 | 1 | 1 | 1 | 1 | 0 | 1 | 7 |
| Pan, X., et al      | 2018 | 0 | 1 | 1 | 1 | 0 | 1 | 1 | 1 | 1 | 1 | 1 | 9 |
| Zhao, W. T., et al  | 2018 | 0 | 1 | 1 | 1 | 0 | 0 | 1 | 1 | 1 | 0 | 1 | 7 |
| Zhang, X., et al    | 2018 | 0 | 1 | 1 | 1 | 0 | 1 | 1 | 1 | 1 | 1 | 1 | 9 |
| Kim, G., et al      | 2017 | 0 | 1 | 1 | 1 | 0 | 1 | 1 | 1 | 1 | 1 | 1 | 9 |
| Chang, K. V., et al | 2017 | 0 | 0 | 1 | 0 | 0 | 1 | 1 | 1 | 1 | 1 | 1 | 7 |
| Liu, P., et al      | 2017 | 0 | 0 | 1 | 1 | 0 | 1 | 1 | 1 | 1 | 1 | 1 | 8 |

---

Table S2. Evidence quality assessment of included health-related outcomes according to the GRADE

| Outcome                                          | Author; year                  | Risk of bias | Inconsistency | Indirectness | Imprecision | Publication bias | Quality of evidence |
|--------------------------------------------------|-------------------------------|--------------|---------------|--------------|-------------|------------------|---------------------|
| OS (head and neck cancer)                        | Wong, A., et al; 2020         | Serious      | Not serious   | Not serious  | Not serious | Serious          | Low                 |
| All-cause mortality (breast cancer)              | Zhang, X. M., et al; 2020     | Serious      | Serious       | Not serious  | Not serious | Not serious      | Low                 |
| Non-relapse mortality (hematological malignancy) | Jia, S., et al; 2020          | Serious      | Not serious   | Not serious  | Serious     | Serious          | Very low            |
| OS (gastrointestinal cancer)                     | Su, H., et al; 2019           | Serious      | Serious       | Not serious  | Not serious | Not serious      | Low                 |
| DFS (gastrointestinal cancer)                    | Su, H., et al; 2019           | Serious      | Not serious   | Not serious  | Not serious | Not serious      | Moderate            |
| OS (pancreatic cancer)                           | Bundred, J., et al; 2019      | Serious      | Serious       | Not serious  | Serious     | Not serious      | Very low            |
| OS (gastric cancer)                              | Kamarajah, S. K., et al; 2019 | Serious      | Not serious   | Not serious  | Not serious | Not serious      | Moderate            |
| RFS (gastric cancer)                             | Kamarajah, S. K., et al; 2019 | Serious      | Not serious   | Not serious  | Serious     | Not serious      | Low                 |
| CSS (gastric cancer)                             | Kamarajah, S. K., et al; 2019 | Serious      | Not serious   | Not serious  | Serious     | Not serious      | Low                 |
| OS (esophageal cancer)                           | Deng, H. Y., et al; 2019      | Serious      | Not serious   | Not serious  | Not serious | Not serious      | Moderate            |
| DFS (esophageal cancer)                          | Deng, H. Y., et al; 2019      | Serious      | Not serious   | Not serious  | Serious     | Serious          | Very low            |
| OS (urothelial carcinoma)                        | Hu, X., et al; 2019           | Serious      | Serious       | Not serious  | Not serious | Not serious      | Low                 |

|                                                           |                           |         |             |             |             |             |          |
|-----------------------------------------------------------|---------------------------|---------|-------------|-------------|-------------|-------------|----------|
| CSS (urothelial carcinoma)                                | Hu, X., et al; 2019       | Serious | Not serious | Not serious | Not serious | Not serious | Moderate |
| OS (lung cancer)                                          | Deng, H. Y., et al; 2019  | Serious | Serious     | Not serious | Not serious | Not serious | Low      |
| DFS (lung cancer)                                         | Deng, H. Y., et al; 2019  | Serious | Serious     | Not serious | Serious     | Serious     | Very low |
| OS (ovarian cancer)                                       | Ubachs, J., et al; 2019   | Serious | Not serious | Not serious | Not serious | Serious     | Low      |
| OS (colorectal cancer)                                    | Sun, G., et al; 2018      | Serious | Not serious | Not serious | Not serious | Not serious | Moderate |
| DFS (colorectal cancer)                                   | Sun, G., et al; 2018      | Serious | Not serious | Not serious | Not serious | Serious     | Low      |
| CSS (colorectal cancer)                                   | Sun, G., et al; 2018      | Serious | Not serious | Not serious | Serious     | Serious     | Very low |
| All-cause mortality (hepatocellular carcinoma)            | Chang, K. V., et al; 2018 | Serious | Not serious | Not serious | Not serious | Not serious | Moderate |
| Recurrence (hepatocellular carcinoma)                     | Chang, K. V., et al; 2018 | Serious | Not serious | Not serious | Serious     | Not serious | Low      |
| Postoperative pulmonary complications (esophageal cancer) | Wang, P. Y., et al; 2020  | Serious | Not serious | Not serious | Not serious | Not serious | Moderate |
| Anastomotic leakage (esophageal cancer)                   | Wang, P. Y., et al; 2020  | Serious | Not serious | Not serious | Serious     | Not serious | Low      |
| Overall postoperative complications (esophageal cancer)   | Wang, P. Y., et al; 2020  | Serious | Not serious | Not serious | Not serious | Not serious | Moderate |
| Rate of readmission (digestive carcinoma)                 | Hua, H., et al; 2019      | Serious | Not serious | Not serious | Serious     | Serious     | Very low |
| Length of hospitalization (digestive carcinoma)           | Hua, H., et al; 2019      | Serious | Serious     | Not serious | Not serious | Serious     | Very low |

|                                                                       |                           |         |             |             |             |             |          |
|-----------------------------------------------------------------------|---------------------------|---------|-------------|-------------|-------------|-------------|----------|
| Major complications (GI cancer)                                       | Simonsen, C., et al; 2018 | Serious | Serious     | Not serious | Not serious | Serious     | Very low |
| Major complications (patients of GI cancer with ERAS care)            | Simonsen, C., et al; 2018 | Serious | Not serious | Not serious | Serious     | Serious     | Very low |
| Major complications (patients of GI cancer without ERAS care)         | Simonsen, C., et al; 2018 | Serious | Serious     | Not serious | Not serious | Serious     | Very low |
| Total complications (GI cancer)                                       | Simonsen, C., et al; 2018 | Serious | Serious     | Not serious | Not serious | Not serious | Low      |
| Postoperative pneumonia (gastric cancer)                              | Yang, Z., et al; 2018     | Serious | Not serious | Not serious | Not serious | Serious     | Low      |
| Postoperative ileus (gastric cancer)                                  | Yang, Z., et al; 2018     | Serious | Not serious | Not serious | Not serious | Serious     | Low      |
| Postoperative intra-abdominal infection (gastric cancer)              | Yang, Z., et al; 2018     | Serious | Not serious | Not serious | Serious     | Serious     | Very low |
| Postoperative anastomotic leakage (gastric cancer)                    | Yang, Z., et al; 2018     | Serious | Not serious | Not serious | Serious     | Serious     | Very low |
| Postoperative delayed gastric emptying (gastric cancer)               | Yang, Z., et al; 2018     | Serious | Not serious | Not serious | Serious     | Serious     | Very low |
| Postoperative infection (colorectal cancer)                           | Sun, G., et al; 2018      | Serious | Not serious | Not serious | Not serious | Serious     | Low      |
| Postoperative anastomotic leakage (colorectal cancer)                 | Sun, G., et al; 2018      | Serious | Not serious | Not serious | Serious     | Serious     | Very low |
| Rate of hospitalization (people over 65 years old)                    | Zhao, Y., et al; 2019     | Serious | Serious     | Not serious | Not serious | Serious     | Very low |
| Rate of readmission (hospitalized people over 65 years old)           | Zhao, Y., et al; 2019     | Serious | Serious     | Not serious | Serious     | Serious     | Very low |
| Length of hospitalization (community living people over 65 years old) | Zhao, Y., et al; 2019     | Serious | Serious     | Not serious | Serious     | Serious     | Very low |

|                                                                          |                                 |         |             |             |             |             |          |
|--------------------------------------------------------------------------|---------------------------------|---------|-------------|-------------|-------------|-------------|----------|
| Risk of falls (community living people over 65 years old)                | Yeung, S. S. Y., et al; 2019    | Serious | Not serious | Not serious | Not serious | Not serious | Moderate |
| Risk of falls (people over 60 years old in nursing home)                 | Zhang, X., et al; 2019          | Serious | Not serious | Not serious | Serious     | Serious     | Very low |
| Risk of fractures (people over 65 years old)                             | Yeung, S. S. Y., et al; 2019    | Serious | Serious     | Not serious | Not serious | Not serious | Low      |
| All-cause mortality (elderly people in nursing home)                     | Zhang, X., et al; 2018          | Serious | Not serious | Not serious | Not serious | Not serious | Moderate |
| All-cause mortality (community living people over 65 years old)          | Liu, P., et al; 2017            | Serious | Not serious | Not serious | Not serious | Not serious | Moderate |
| Risk of cognitive impairment (community living people over 60 years old) | Cabett Cipolli, G., et al; 2019 | Serious | Serious     | Not serious | Not serious | Serious     | Very low |
| Risk of dysphagia (people over 60 years old)                             | Zhao, W. T., et al; 2018        | Serious | Not serious | Not serious | Serious     | Serious     | Very low |
| Hepatic encephalopathy (patients with liver cirrhosis)                   | Chang, K. V., et al; 2019       | Serious | Serious     | Not serious | Not serious | Serious     | Very low |
| Metabolic syndrome (middle-aged and older non-obese adults)              | Zhang, H., et al; 2018          | Serious | Serious     | Not serious | Not serious | Not serious | Low      |
| Steatohepatitis (patients with nonalcoholic fatty liver disease)         | Yu, R., et al; 2018             | Serious | Not serious | Not serious | Serious     | Serious     | Very low |
| Risk of nonalcoholic fatty liver disease                                 | Pan, X., et al; 2018            | Serious | Serious     | Not serious | Not serious | Not serious | Low      |
| Mortality of liver cirrhosis (patients with liver cirrhosis)             | Kim, G., et al; 2017            | Serious | Not serious | Not serious | Serious     | Not serious | Low      |
| Albuminuria (patients with diabetes)                                     | Ida, S., et al; 2019            | Serious | Not serious | Not serious | Not serious | Serious     | Low      |
| Risk of depression                                                       | Chang, K. V., et al; 2017       | Serious | Serious     | Not serious | Not serious | Serious     | Very low |

---



References of the 54 studies meeting the inclusion criteria of this umbrella review:

1. Zhang XM, Dou QL, Zeng Y, Yang Y, Cheng ASK, Zhang WW. Sarcopenia as a predictor of mortality in women with breast cancer: a meta-analysis and systematic review. *BMC Cancer*. Mar 4 2020;20(1):172.
2. Wong A, Zhu D, Kraus D, Tham T. Radiologically Defined Sarcopenia Affects Survival in Head and Neck Cancer: A Meta-Analysis. *Laryngoscope*. Mar 27 2020.
3. Wang PY, Xu LD, Chen XK, et al. Sarcopenia and Short-Term Outcomes After Esophagectomy: A Meta-analysis. *Ann Surg Oncol*. Feb 10 2020.
4. Schizas D, Frountzas M, Lidoriki I, et al. Sarcopenia does not affect postoperative complication rates in oesophageal cancer surgery: a systematic review and meta-analysis. *Ann R Coll Surg Engl*. Feb 2020;102(2):120-132.
5. Papaconstantinou D, Vretakakou K, Paspala A, et al. The impact of preoperative sarcopenia on postoperative complications following esophagectomy for esophageal neoplasia: a systematic review and meta-analysis. *Dis Esophagus*. Mar 20 2020.
6. McSharry V, Mullee A, McCann L, Rogers AC, McKiernan M, Brennan DJ. The Impact of Sarcopenia and Low Muscle Attenuation on Overall Survival in Epithelial Ovarian Cancer: A Systematic Review and Meta-analysis. *Ann Surg Oncol*. Mar 27 2020.
7. Jia S, Qiao R, Xiao Y, et al. Prognostic value of sarcopenia in survivors of hematological malignancies undergoing a hematopoietic stem cell transplantation: a systematic review and meta-analysis. *Support Care Cancer*. Feb 23 2020.
8. Guo Z, Gu C, Gan S, et al. Sarcopenia as a predictor of postoperative outcomes after urologic oncology surgery: A systematic review and meta-analysis. *Urol Oncol*. Apr 5 2020.
9. Chen H, Ma J, Liu A, Cui Y, Ma X. The association between sarcopenia and fracture in middle-aged and elderly people: A systematic review and meta-analysis of cohort studies. *Injury*. Feb 18 2020.
10. Zhao Y, Zhang Y, Hao Q, Ge M, Dong B. Sarcopenia and hospital-related outcomes in the old people: a systematic review and meta-analysis. *Aging Clin Exp Res*. Jan 2019;31(1):5-14.
11. Zhang X, Huang P, Dou Q, et al. Falls among older adults with sarcopenia dwelling in nursing home or community: A meta-analysis. *Clin Nutr*. Jan 8 2019.
12. Yeung SSY, Reijnierse EM, Pham VK, et al. Sarcopenia and its association with falls and fractures in older adults: A systematic review and meta-analysis. *J Cachexia*

Sarcopenia Muscle. Jun 2019;10(3):485-500.

13. Yang M, Shen Y, Tan L, Li W. Prognostic Value of Sarcopenia in Lung Cancer: A Systematic Review and Meta-analysis. *Chest*. May 22 2019.

14. Ubachs J, Ziemons J, Minis-Rutten IJG, et al. Sarcopenia and ovarian cancer survival: a systematic review and meta-analysis. *J Cachexia Sarcopenia Muscle*. Dec 2019;10(6):1165-1174.

15. Su H, Ruan J, Chen T, Lin E, Shi L. CT-assessed sarcopenia is a predictive factor for both long-term and short-term outcomes in gastrointestinal oncology patients: a systematic review and meta-analysis. *Cancer imaging : the official publication of the International Cancer Imaging Society*. Dec 3 2019;19(1):82.

16. Peng TC, Chen WL, Wu LW, Chang YW, Kao TW. Sarcopenia and cognitive impairment: A systematic review and meta-analysis. *Clin Nutr*. Dec 17 2019.

17. Li J, Deng Y, Zhang M, Cheng Y, Zhao X, Ji Z. Prognostic value of radiologically determined sarcopenia prior to treatment in urologic tumors: A meta-analysis. *Medicine (Baltimore)*. Sep 2019;98(38):e17213.

18. Kamarajah SK, Bundred J, Tan BHL. Body composition assessment and sarcopenia in patients with gastric cancer: a systematic review and meta-analysis. *Gastric Cancer*. Jan 2019;22(1):10-22.

19. Ida S, Kaneko R, Imataka K, Murata K. Association between Sarcopenia and Renal Function in Patients with Diabetes: A Systematic Review and Meta-Analysis. *J Diabetes Res*. 2019;2019:1365189.

20. Hua H, Xu X, Tang Y, Ren Z, Xu Q, Chen L. Effect of sarcopenia on clinical outcomes following digestive carcinoma surgery: a meta-analysis. *Support Care Cancer*. Jul 2019;27(7):2385-2394.

21. Hu X, Dou WC, Shao YX, et al. The prognostic value of sarcopenia in patients with surgically treated urothelial carcinoma: A systematic review and meta-analysis. *Eur J Surg Oncol*. May 2019;45(5):747-754.

22. Eros A, Soos A, Hegyi P, et al. Sarcopenia as an independent predictor of the surgical outcomes of patients with inflammatory bowel disease: a meta-analysis. *Surg Today*. Oct 15 2019.

23. Deng HY, Zha P, Peng L, Hou L, Huang KL, Li XY. Preoperative sarcopenia is a predictor of poor prognosis of esophageal cancer after esophagectomy: a comprehensive systematic review and meta-analysis. *Dis Esophagus*. Mar 1 2019;32(3).

24. Deng HY, Hou L, Zha P, Huang KL, Peng L. Sarcopenia is an independent

unfavorable prognostic factor of non-small cell lung cancer after surgical resection: A comprehensive systematic review and meta-analysis. *Eur J Surg Oncol.* May 2019;45(5):728-735.

25. Chang KV, Chen JD, Wu WT, Huang KC, Lin HY, Han DS. Is sarcopenia associated with hepatic encephalopathy in liver cirrhosis? A systematic review and meta-analysis. *J Formos Med Assoc.* Apr 2019;118(4):833-842.

26. Cabett Cipolli G, Sanches Yassuda M, Aprahamian I. Sarcopenia Is Associated with Cognitive Impairment in Older Adults: A Systematic Review and Meta-Analysis. *J Nutr Health Aging.* 2019;23(6):525-531.

27. Bundred J, Kamarajah SK, Roberts KJ. Body composition assessment and sarcopenia in patients with pancreatic cancer: a systematic review and meta-analysis. *HPB (Oxford).* Dec 2019;21(12):1603-1612.

28. Antoniou GA, Rojoa D, Antoniou SA, Alfahad A, Torella F, Juszczak MT. Effect of Low Skeletal Muscle Mass on Post-operative Survival of Patients With Abdominal Aortic Aneurysm: A Prognostic Factor Review and Meta-Analysis of Time-to-Event Data. *Eur J Vasc Endovasc Surg.* Jun 13 2019.

29. Zhao WT, Yang M, Wu HM, Yang L, Zhang XM, Huang Y. Systematic Review and Meta-Analysis of the Association between Sarcopenia and Dysphagia. *J Nutr Health Aging.* 2018;22(8):1003-1009.

30. Zhang Y, Hao Q, Ge M, Dong B. Association of sarcopenia and fractures in community-dwelling older adults: a systematic review and meta-analysis of cohort studies. *Osteoporos Int.* Jun 2018;29(6):1253-1262.

31. Zhang X, Zhang W, Wang C, Tao W, Dou Q, Yang Y. Sarcopenia as a predictor of hospitalization among older people: a systematic review and meta-analysis. *BMC Geriatr.* Aug 22 2018;18(1):188.

32. Zhang X, Wang C, Dou Q, Zhang W, Yang Y, Xie X. Sarcopenia as a predictor of all-cause mortality among older nursing home residents: a systematic review and meta-analysis. *Bmj Open.* Nov 12 2018;8(11):e021252.

33. Zhang H, Lin S, Gao T, et al. Association between Sarcopenia and Metabolic Syndrome in Middle-Aged and Older Non-Obese Adults: A Systematic Review and Meta-Analysis. *Nutrients.* Mar 16 2018;10(3).

34. Yu R, Shi Q, Liu L, Chen L. Relationship of sarcopenia with steatohepatitis and advanced liver fibrosis in non-alcoholic fatty liver disease: a meta-analysis. *Bmc Gastroenterol.* Apr 19 2018;18(1):51.

35. Yang Z, Zhou X, Ma B, Xing Y, Jiang X, Wang Z. Predictive Value of Preoperative Sarcopenia in Patients with Gastric Cancer: a Meta-analysis and Systematic Review. *J Gastrointest Surg.* Nov 2018;22(11):1890-1902.
36. Wijarnpreecha K, Panjawatanan P, Thongprayoon C, Jaruvongvanich V, Ungprasert P. Sarcopenia and risk of nonalcoholic fatty liver disease: A meta-analysis. *Saudi J Gastroenterol.* Jan-Feb 2018;24(1):12-17.
37. Sun G, Li Y, Peng Y, et al. Can sarcopenia be a predictor of prognosis for patients with non-metastatic colorectal cancer? A systematic review and meta-analysis. *Int J Colorectal Dis.* Oct 2018;33(10):1419-1427.
38. Simonsen C, de Heer P, Bjerre ED, et al. Sarcopenia and Postoperative Complication Risk in Gastrointestinal Surgical Oncology: A Meta-analysis. *Ann Surg.* Jul 2018;268(1):58-69.
39. Ratnayake CB, Loveday BP, Shrikhande SV, Windsor JA, Pandanaboyana S. Impact of preoperative sarcopenia on postoperative outcomes following pancreatic resection: A systematic review and meta-analysis. *Pancreatology.* Dec 2018;18(8):996-1004.
40. Pan X, Han Y, Zou T, et al. Sarcopenia Contributes to the Progression of Nonalcoholic Fatty Liver Disease- Related Fibrosis: A Meta-Analysis. *Dig Dis.* 2018;36(6):427-436.
41. Mintziras I, Miligkos M, Wachter S, Manoharan J, Maurer E, Bartsch DK. Sarcopenia and sarcopenic obesity are significantly associated with poorer overall survival in patients with pancreatic cancer: Systematic review and meta-analysis. *Int J Surg.* Nov 2018;59:19-26.
42. Hajibandeh S, Jarvis R, Bhogal T, Dalmia S. Meta-analysis of the effect of sarcopenia in predicting postoperative mortality in emergency and elective abdominal surgery. *Surgeon.* Oct 30 2018.
43. Du Y, Oh C, No J. Associations between Sarcopenia and Metabolic Risk Factors: A Systematic Review and Meta-Analysis. *J Obes Metab Syndr.* Sep 30 2018;27(3):175-185.
44. Chang KV, Chen JD, Wu WT, Huang KC, Hsu CT, Han DS. Association between Loss of Skeletal Muscle Mass and Mortality and Tumor Recurrence in Hepatocellular Carcinoma: A Systematic Review and Meta-Analysis. *Liver Cancer.* Mar 2018;7(1):90-103.
45. Boshier PR, Heneghan R, Markar SR, Baracos VE, Low DE. Assessment of body

composition and sarcopenia in patients with esophageal cancer: a systematic review and meta-analysis. *Dis Esophagus*. Aug 1 2018;31(8).

46. Zhang G, Meng S, Li R, Ye J, Zhao L. Clinical significance of sarcopenia in the treatment of patients with primary hepatic malignancies, a systematic review and meta-analysis. *Oncotarget*. Nov 24 2017;8(60):102474-102485.

47. Shen Y, Hao Q, Zhou J, Dong B. The impact of frailty and sarcopenia on postoperative outcomes in older patients undergoing gastrectomy surgery: a systematic review and meta-analysis. *BMC Geriatr*. Aug 21 2017;17(1):188.

48. Sandini M, Pinotti E, Persico I, Picone D, Bellelli G, Gianotti L. Systematic review and meta-analysis of frailty as a predictor of morbidity and mortality after major abdominal surgery. *BJS Open*. Oct 2017;1(5):128-137.

49. Liu P, Hao Q, Hai S, Wang H, Cao L, Dong B. Sarcopenia as a predictor of all-cause mortality among community-dwelling older people: A systematic review and meta-analysis. *Maturitas*. Sep 2017;103:16-22.

50. Kim G, Kang SH, Kim MY, Baik SK. Prognostic value of sarcopenia in patients with liver cirrhosis: A systematic review and meta-analysis. *Plos One*. 2017;12(10):e0186990.

51. Jones K, Gordon-Weeks A, Coleman C, Silva M. Radiologically Determined Sarcopenia Predicts Morbidity and Mortality Following Abdominal Surgery: A Systematic Review and Meta-Analysis. *World J Surg*. Sep 2017;41(9):2266-2279.

52. Chang KV, Hsu TH, Wu WT, Huang KC, Han DS. Is sarcopenia associated with depression? A systematic review and meta-analysis of observational studies. *Age Ageing*. Sep 1 2017;46(5):738-746.

53. Shachar SS, Williams GR, Muss HB, Nishijima TF. Prognostic value of sarcopenia in adults with solid tumours: A meta-analysis and systematic review. *Eur J Cancer*. Apr 2016;57:58-67.

54. Chang KV, Hsu TH, Wu WT, Huang KC, Han DS. Association Between Sarcopenia and Cognitive Impairment: A Systematic Review and Meta-Analysis. *J Am Med Dir Assoc*. Dec 1 2016;17(12):1164 e1167-1164 e1115.
